# Supplementary material for: Epidermal control of axonal attachment via β-spectrin and the GTPase-activating protein TBC-10 prevents axonal degeneration
Source: PubMed Central journal article supplement (PMC6952388; doi:10.1038/s41467-019-13795-x), 2020-01-09
Supplement: 41467_2019_13795_MOESM1_ESM.pdf [file 41467_2019_13795_MOESM1_ESM.pdf]

## **Supplementary Information**

**Epidermal control of axonal attachment via  $\beta$ -spectrin and the GTPase-activating protein TBC-10 prevents axonal degeneration**

Coakley et al.

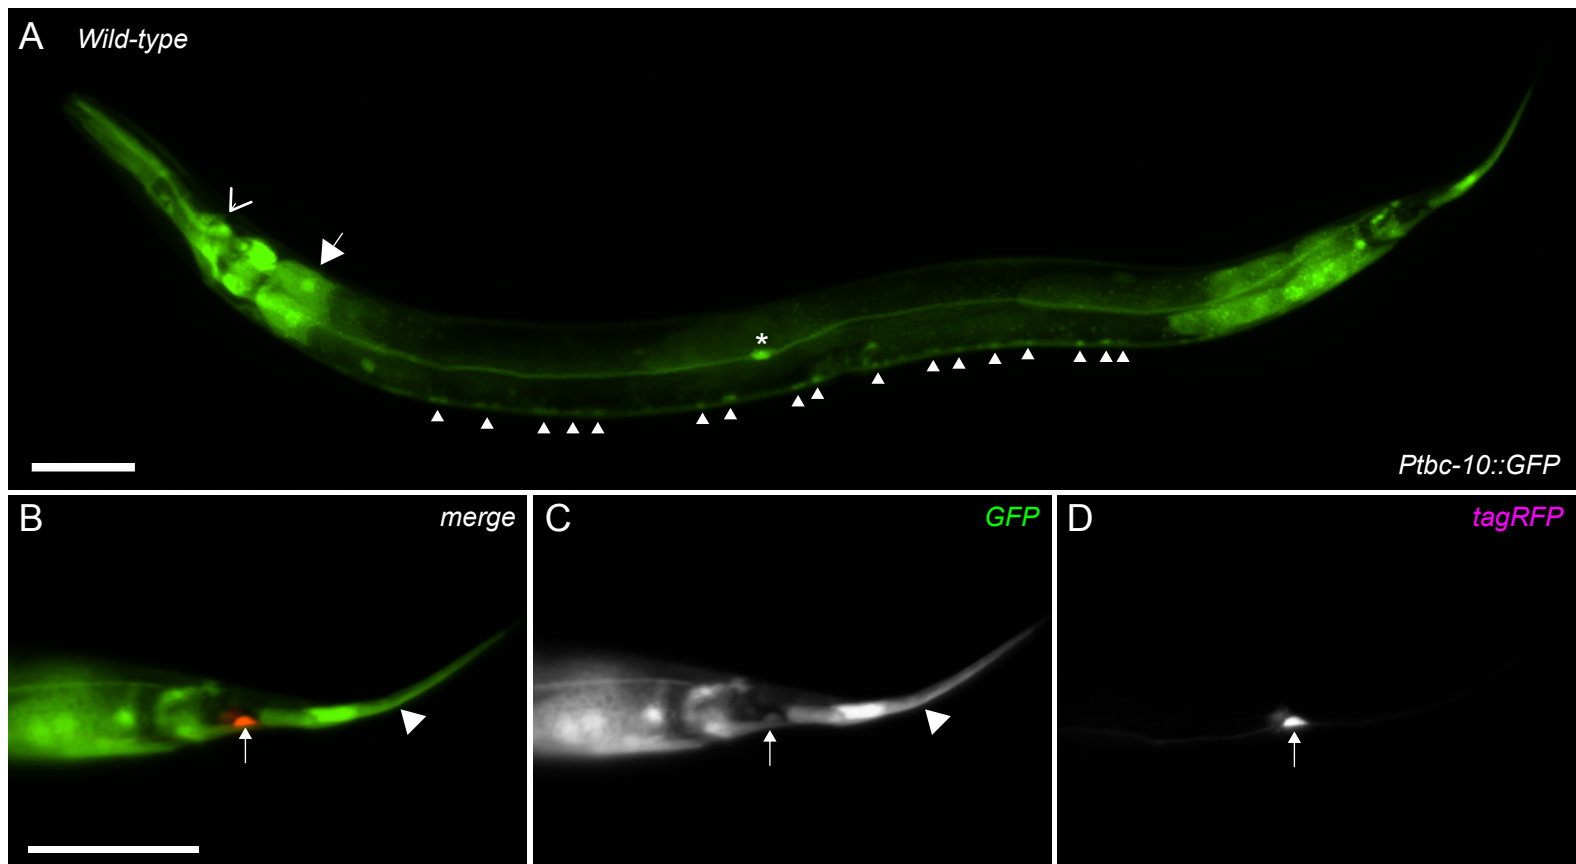

**Supplementary Figure 1. *tbc-10* is expressed in multiple tissues, including the PLM neuron.** (A) Image showing the expression pattern of a cytosolic GFP expressed under the control of a 5 kb region of the endogenous *tbc-10* promoter. GFP is visible in multiple tissues, including the excretory canal (asterisk), intestine (arrow), ventral neurons (closed arrowheads) and the pharynx (open arrowhead). (B-D) Magnified image showing weak GFP expression within the PLM neuron (arrow in B-D), which is labeled with a cytosolic tagRFP (*Pmec-17::tagRFP*), as well as in the epidermis (arrowhead in B and C). Expression in these tissues was observed in animals from 10 independent transgenic lines. Scale bars in A and B are 50  $\mu$ m.

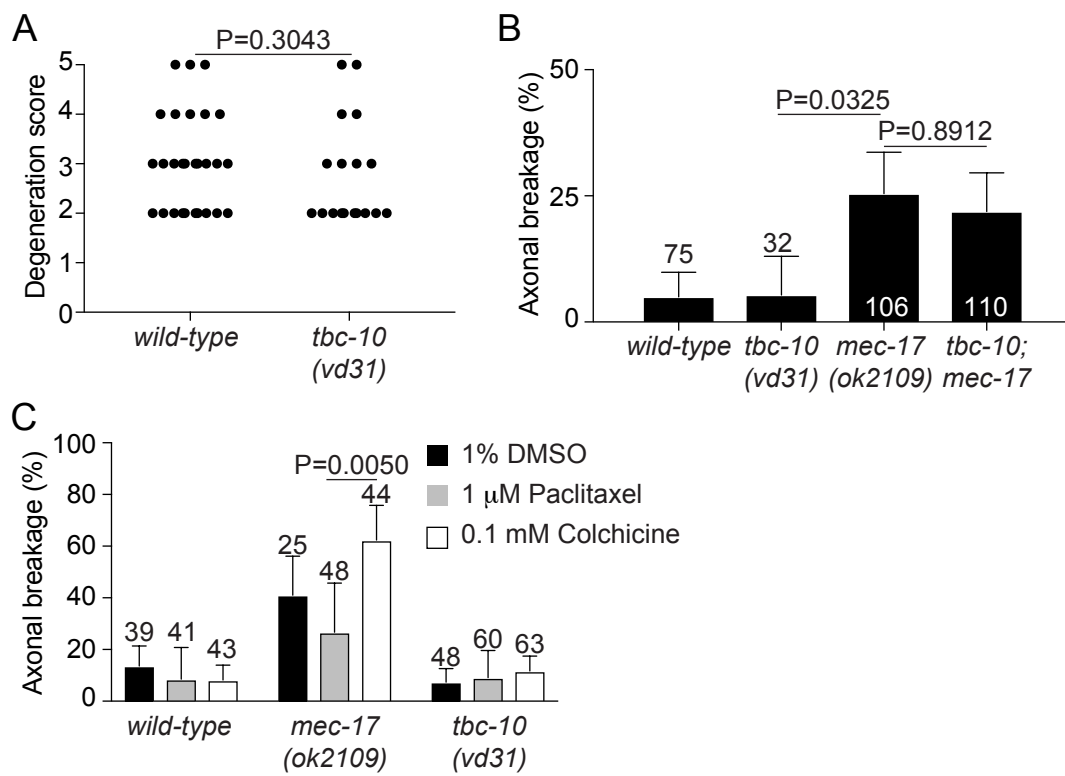

**Supplementary Figure 2. TBC-10 does not protect against axonal degeneration after injury.** (A) Degeneration of the distal fragment of the PLM axon in wild-type and *tbc-10* mutants following axotomy with a UV-laser. The results are classified as an axonal integrity score with a value of 1 (completely cleared) to 5 (intact). Each data point represents an individual animal.  $N = 28$  animals for wild-type and  $N = 18$  animals for *tbc-10(vd31)* (B) Mean penetrance of axonal breaks in 3-day-old animals carrying single and double mutations in *tbc-10* and the acetyltransferase *mec-17*. (C) Single mutants for *tbc-10* and *mec-17* were grown on agar plates containing either 1% DMSO, 1  $\mu$ M paclitaxel, or 0.1 mM colchicine, and scored for axonal breaks at 1-day-old. Mean penetrance of axonal breaks is shown in bar graphs. P-value in A determined by a two-tailed Mann-Whitney test. P-values in B-C determined from a one-way ANOVA with a Tukey multiple-comparison of proportions using an Agresti-Coull interval. Error bars indicate a 95% confidence interval. N-values are indicated on bar graphs and represent the number of individual animals scored for each condition. Source data are provided as a Source Data file.

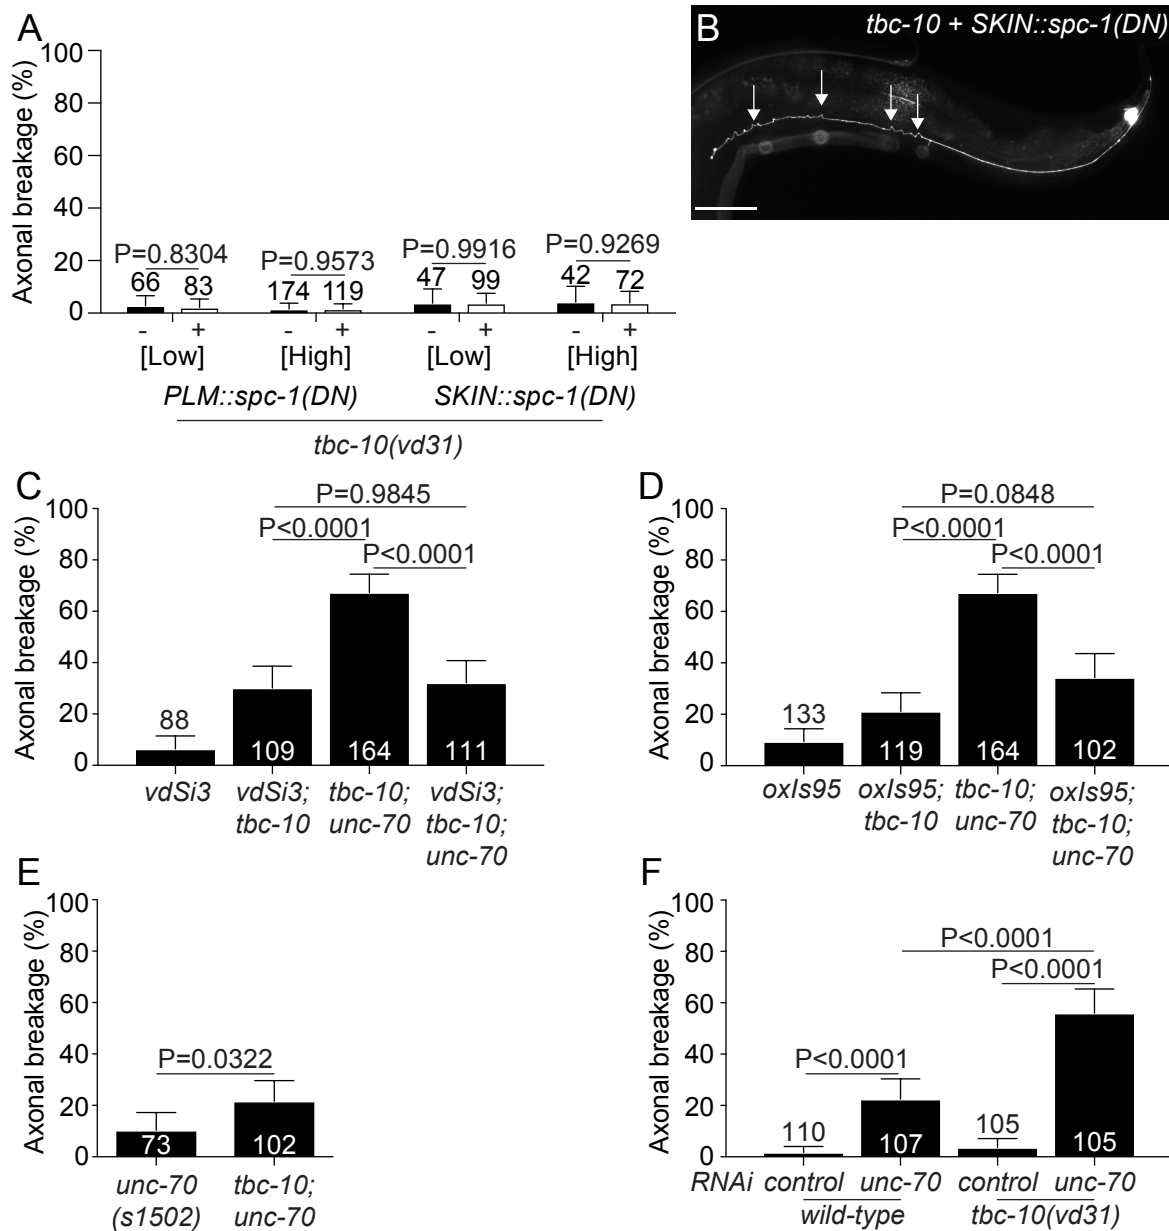

**Supplementary Figure 3. UNC-70/B-spectrin functions in the epidermis to protect from axonal breaks.** (A) Mean penetrance of axonal breaks in *tbc-10* mutants carrying transgenes expressing at low or high concentrations of a dominant negative *spc-1/α-spectrin* under either a touch receptor neuron-specific promoter, or an epidermal-specific promoter, versus their respective non-transgenic siblings. (B) Image showing a typical *tbc-10* animal carrying a transgene expressing a dominant negative *spc-1/α-spectrin* under an epidermal-specific promoter, with buckles clearly visible in the PLM axon (indicated by arrows). This phenotype was seen in 8 independent transgenic lines. Scale bar in (B) is 50 μm. (C) Mean penetrance of axonal breaks in *tbc-10* and *unc-70* single and double mutant animals with and without the single-copy insertion *vdSi3(Pdpy-7::unc-70::mKate2)*, which expresses a wild-type copy of UNC-70::mKate2 specifically within the epidermis. (D) Mean penetrance of axonal breaks in *tbc-10* and *unc-70* single and double mutant animals with and without a multi-copy integrated transgene *oxIs95(Pdli-2::unc-70)*, which overexpresses a wild-type copy of UNC-70 specifically within the epidermis. (E) Mean penetrance of axonal breaks in *unc-70* null mutants and *tbc-10;unc-70* double mutant animals. (F) Mean penetrance of axonal breaks in wild-type and *tbc-10* mutant animals upon *unc-70* RNAi feeding versus their respective controls. P-values in A and E determined from a comparison of proportions using an Agresti-Coull interval. P-values in C, D and F are determined from a one-way ANOVA with a Tukey multiple-comparison of proportions using an Agresti-Coull interval. Error bars indicate a 95% confidence interval. N-values are indicated on bar graphs and represent the number of individual animals scored for each condition. Source data are provided as a Source Data file.

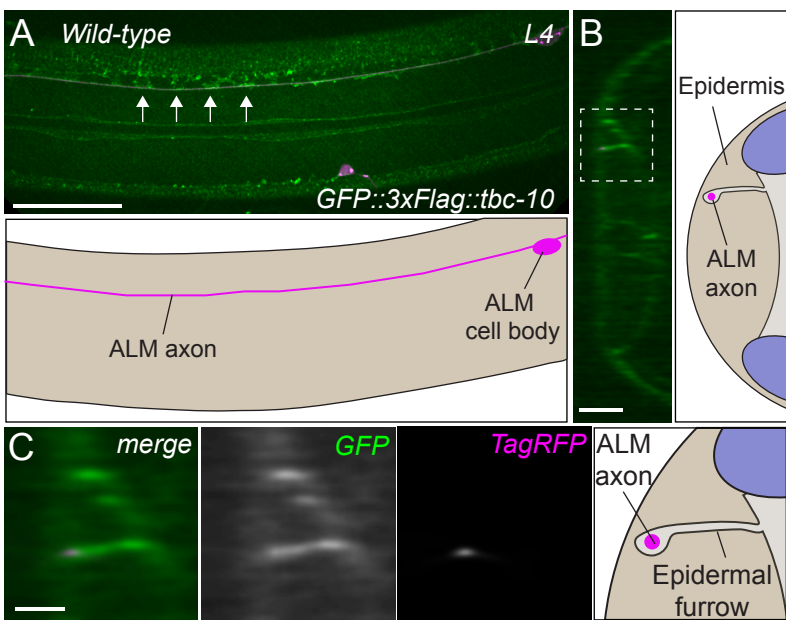

**Supplementary Figure 4. TBC-10 localizes to the epidermal membrane.** (A) Deconvolved spinning disk confocal maximum projection and scheme of GFP::3xFlag::TBC-10 localization in a typical wild-type animal, with the ALM neuron labeled with a cytosolic TagRFP (*Pmec-17::tagRFP*; magenta). Arrows indicate regions of the epidermal furrow visible in a lateral perspective. (B) An orthogonal perspective and scheme of GFP::3xFlag::TBC-10 localization in the projected z-stack shown in A. (C) A high magnification image and scheme of the boxed area in B. These micrographs are representative of the GFP::3xFlag::TBC-10 localization seen in N = 6 animals at the L4 stage. Scale bars are 25  $\mu\text{m}$  in A, 5  $\mu\text{m}$  in B, and 2  $\mu\text{m}$  in C.

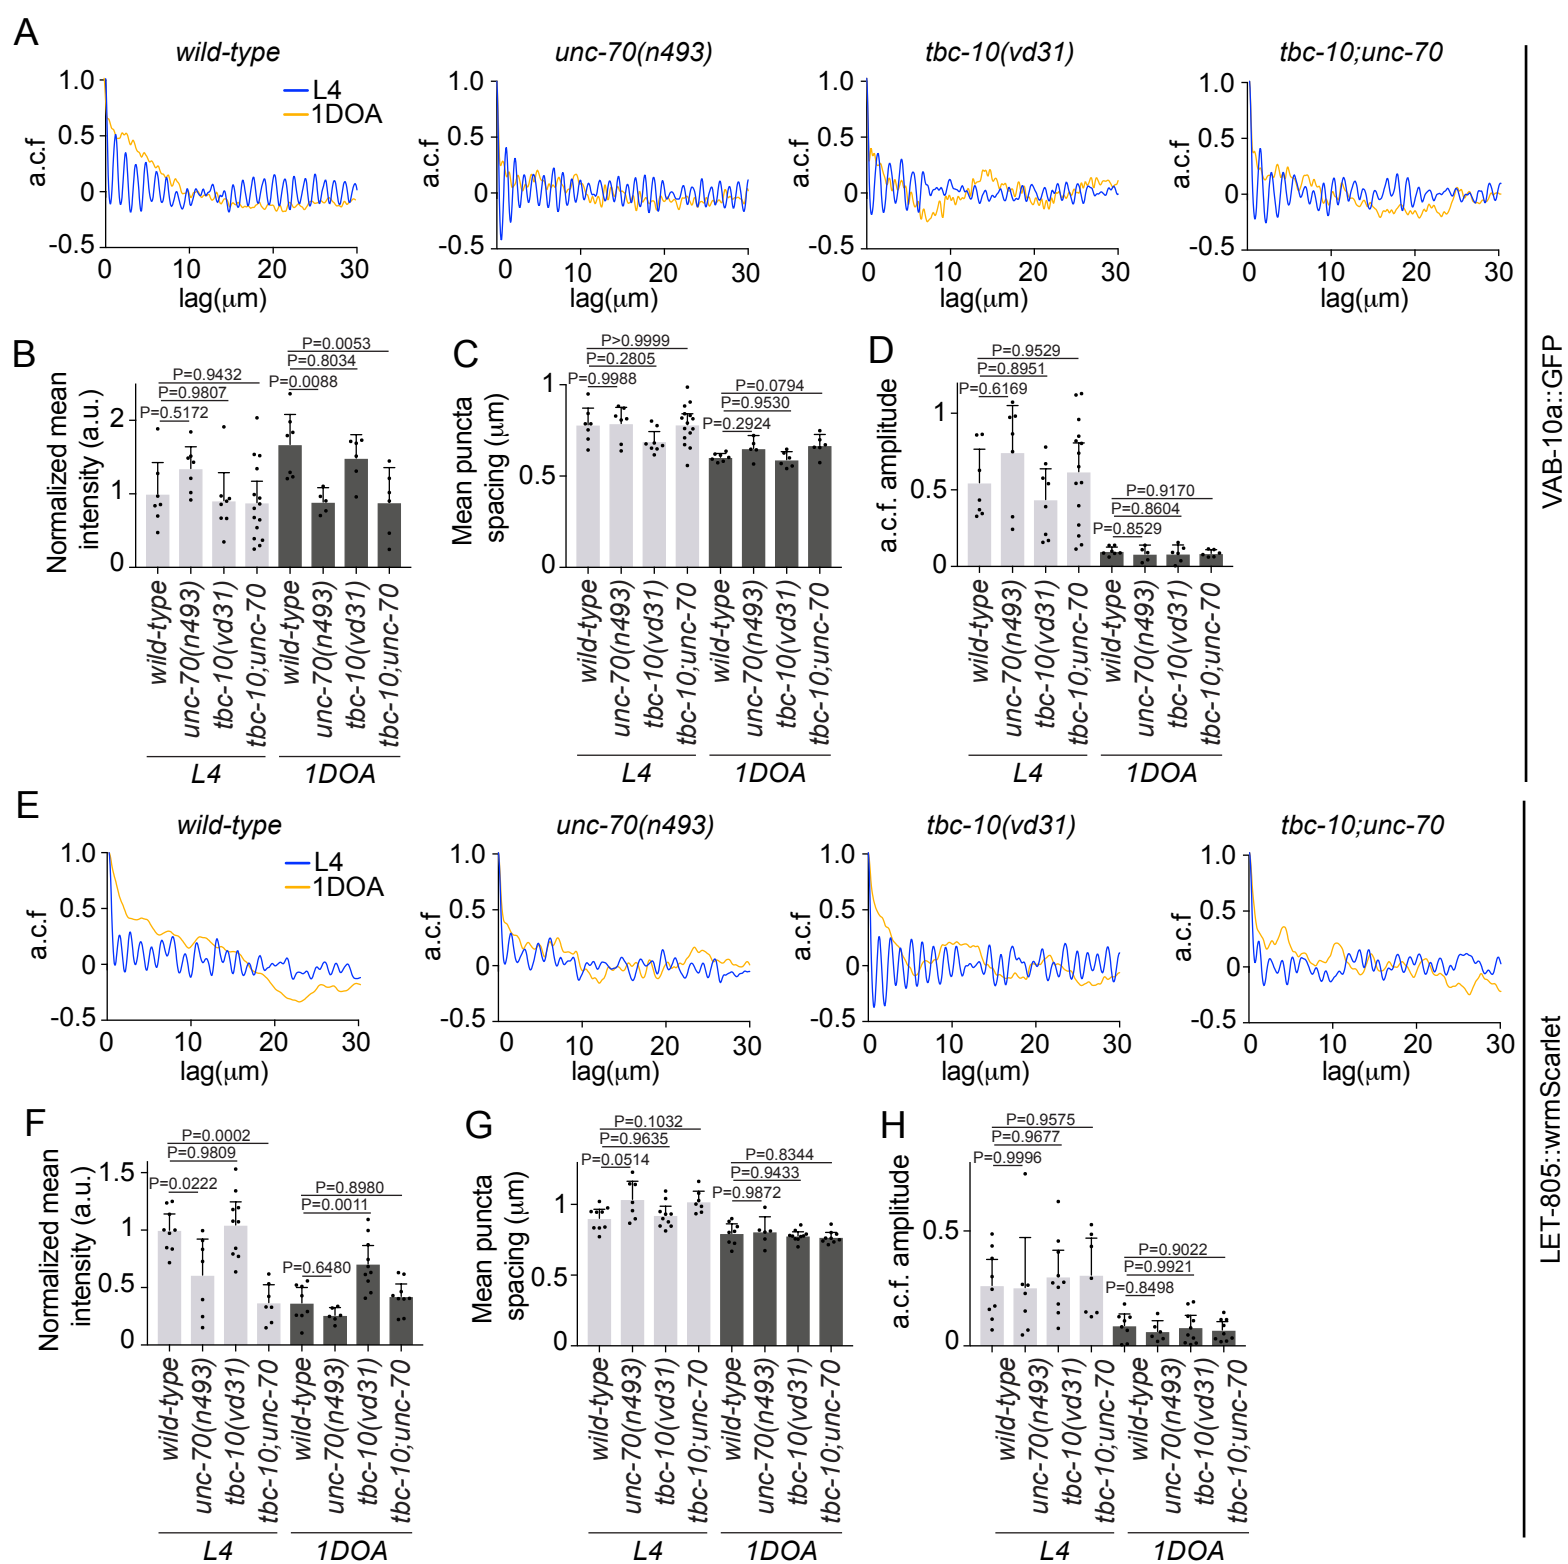

**Supplementary Figure 5. Quantification of VAB-10a and LET-805 localization.** (A) Autocorrelation analysis of VAB-10a::GFP localizations in representative examples of wild-type, *unc-70*, *tbc-10*, and *tbc-10;unc-70* mutant animals at L4 and 1-day-old adults (1DOAs). (B) Mean intensity of VAB-10a::GFP puncta in wild-type, *unc-70*, *tbc-10*, and *tbc-10;unc-70* mutant animals at L4 and 1DOAs. (C) Mean spacing between VAB-10a::GFP puncta in wild-type, *unc-70*, *tbc-10*, and *tbc-10;unc-70* mutant animals at L4 and 1DOAs. (D) Mean autocorrelation amplitude of VAB-10a::GFP localizations in wild-type, *tbc-10*, *unc-70*, *tbc-10*, and *tbc-10;unc-70* mutant animals at L4 and 1DOAs. (E) Autocorrelation analysis of LET-805::wrmScarlet localizations in representative examples of wild-type, *unc-70*, *tbc-10*, and *tbc-10;unc-70* mutant animals at L4 and 1DOAs. (F) Mean intensity of LET-805::wrmScarlet puncta in wild-type, *unc-70*, *tbc-10*, and *tbc-10;unc-70* mutant animals at L4 and 1DOAs. (G) Mean spacing between LET-805::wrmScarlet puncta in wild-type, *unc-70*, *tbc-10*, and *tbc-10;unc-70* mutant animals at L4 and 1DOAs. (H) Mean autocorrelation amplitude of LET-805::wrmScarlet localizations in wild-type, *unc-70*, *tbc-10*, and *tbc-10;unc-70* mutant animals at L4 and 1DOAs. P-values in B-D and F-H are determined from one-way ANOVAs with a Tukey multiple-comparison of means. Error bars indicate a 95% confidence interval. Each data point on bar graphs represents an individual animal. For panels B-D N = 7, 7, 8 and 15 animals for wild-type, *unc-70*, *tbc-10*, and *tbc-10;unc-70* at the L4 stage and N = 7, 5, 6 and 6 for wild-type, *unc-70*, *tbc-10*, and *tbc-10;unc-70* at the 1DOA stage. For panels F-H N = 9, 7, 10 and 7 animals for wild-type, *unc-70*, *tbc-10*, and *tbc-10;unc-70* at the L4 stage and N = 8, 6, 10 and 9 for wild-type, *unc-70*, *tbc-10*, and *tbc-10;unc-70* at the 1DOA stage. Source data are provided as a Source Data file.

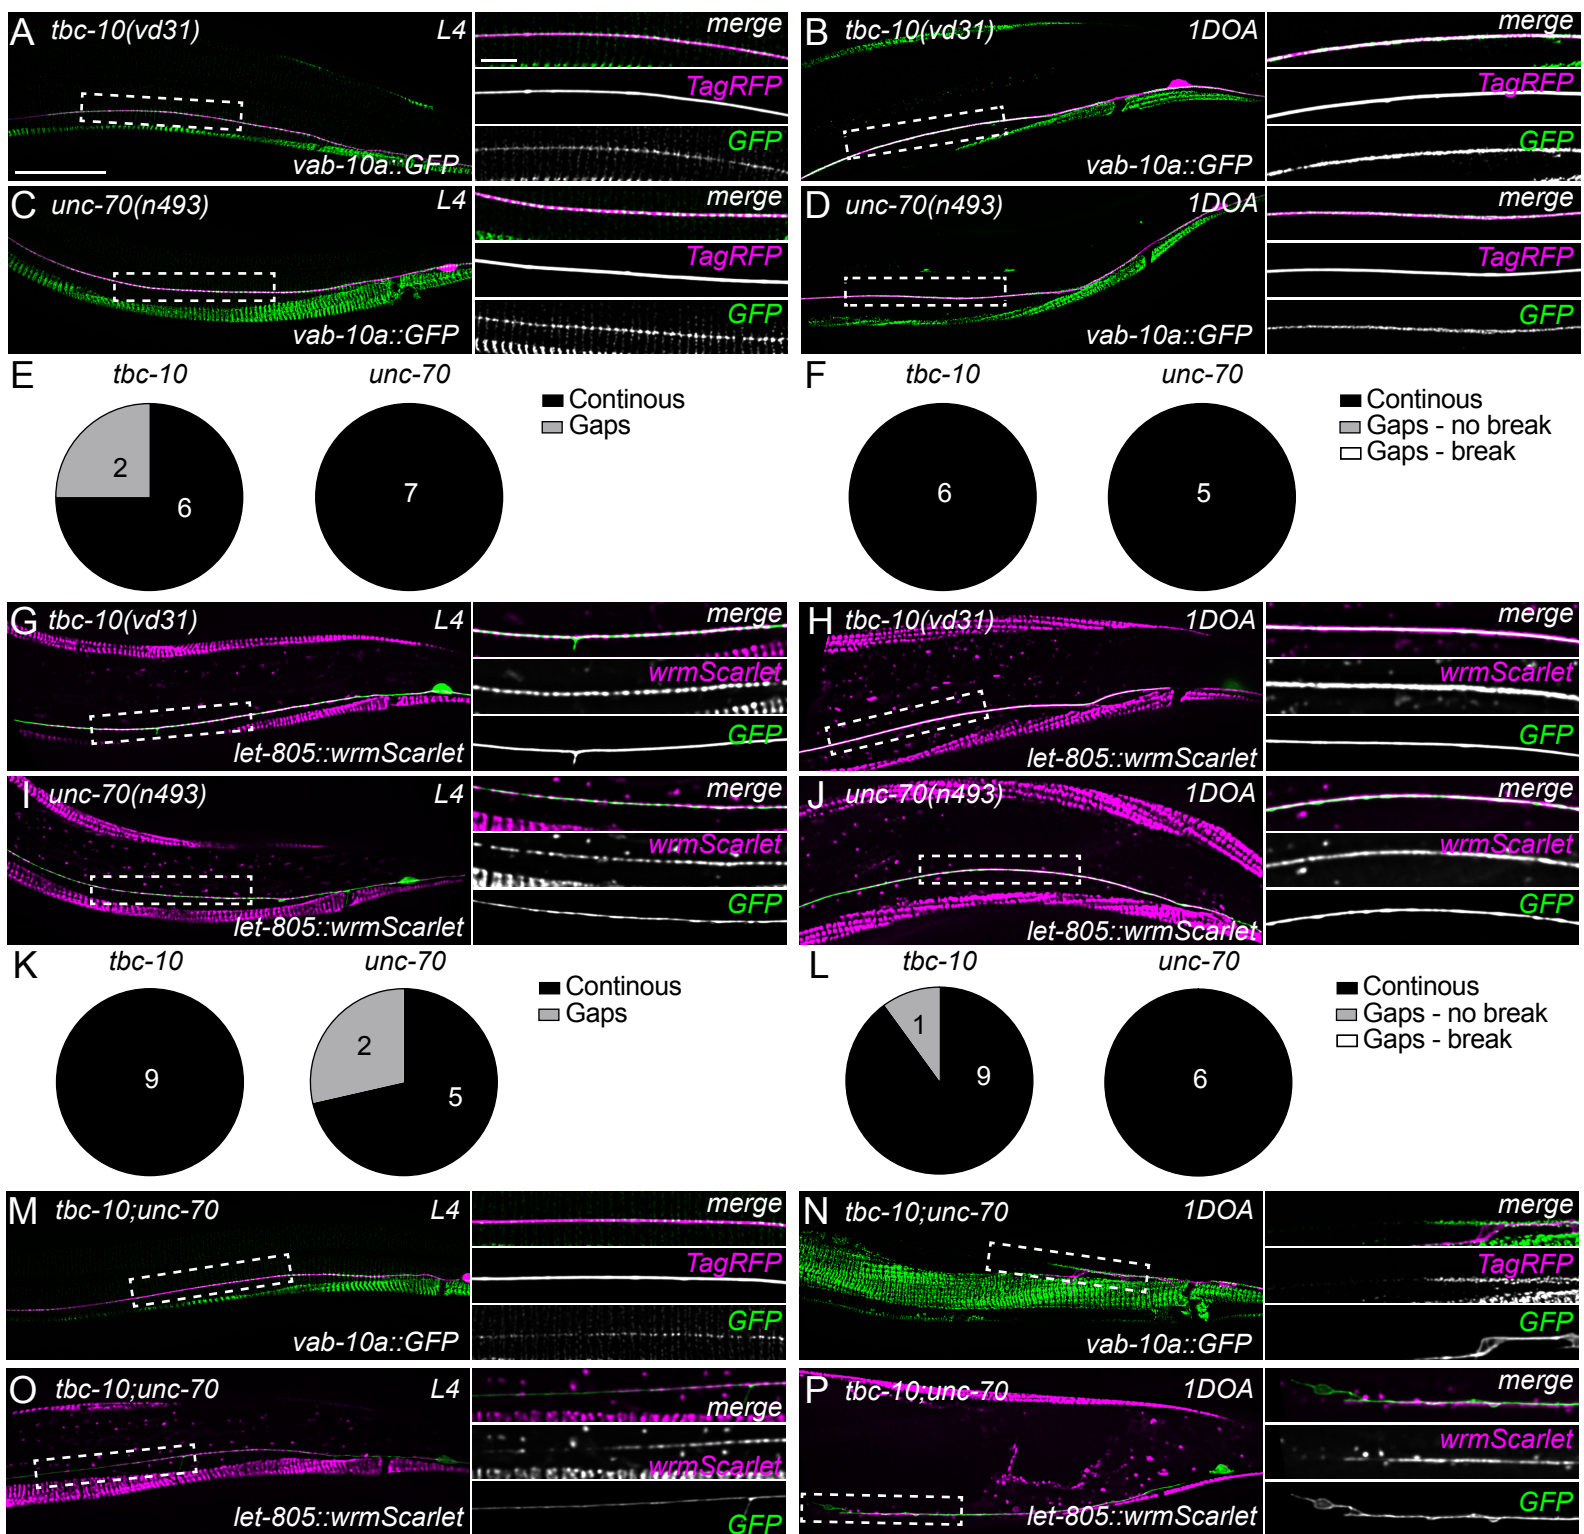

**Supplementary Figure 6. Axonal attachment is maintained in single mutants and loss of attachment precedes axonal breakage in *tbc-10;unc-70* mutants.** (A-D) Typical endogenous VAB-10a::GFP localization at the L4 (A and C) and 1-day old adult (1DOA) (B and D) stage in *tbc-10* (A-B) and *unc-70* (C-D) mutants from a lateral perspective with the PLM neuron labeled with a cytosolic TagRFP (*Pmec-17::tagRFP*; magenta) similar to as described in Figure 4. (E) Normalized intensities of VAB-10a::GFP along a 50  $\mu$ m of the PLM axon at the L4 stage were scored as having gaps or continuous attachment. (F) VAB-10a::GFP localization at the 1DOA stage was scored as continuous or containing gaps with, and without, axonal breakage. (G-J) Typical endogenous LET-805::wrmScarlet localization (magenta) at the L4 (G and I) and 1DOA (H and J) stage in *tbc-10* (G-H) and *unc-70* (I-J) mutants from a lateral perspective with the PLM neuron labeled with a GFP (*Pmec-4::GFP*) similar to as described in Figure 5. (K) Normalized intensities of LET-805::wrmScarlet along a 50  $\mu$ m of the PLM axon at the L4 stage were scored as having gaps or continuous attachment. (L) LET-805::wrmScarlet localization at the 1DOA stage was scored as continuous attachment or containing gaps with, and without, axonal breakage. (M-N) Images of typical endogenous VAB-10a::GFP localization in the same *tbc-10;unc-70* animal (M) at the L4 stage and (N) 24 h later as a 1DOA. The PLM neuron is labeled with a cytosolic tagRFP (*Pmec-17::tagRFP*; magenta). In total 5/10 animals followed from L4 to 1DOA developed breaks, all of these had altered VAB-10a::GFP localization preceding breakage. (O-P) Images of typical endogenous LET-805::wrmScarlet localization in the same *tbc-10;unc-70* animal (O) at the L4 stage and (P) 24 h later as a 1-day-old adult. The PLM neuron is labeled with a cytosolic GFP (*Pmec-4::GFP*). In total 2/4 animals followed from L4 to 1DOA developed breaks, all of these had altered LET-805::wrmScarlet localization preceding breakage. Scale bars in A are 25  $\mu$ m and 5  $\mu$ m in the left and side panels, respectively. N-values are indicated on charts and represent the number of individual animals scored for each condition.

| Strain  | Genotype                                                                        | Stage | PLM Break | n   |
|---------|---------------------------------------------------------------------------------|-------|-----------|-----|
| CZ10175 | <i>zdfs5</i>                                                                    | 1DOA  | 0         | 227 |
| QH5834  | <i>tbc-10(vd31)</i>                                                             | 1DOA  | 0         | 163 |
| QH5343  | <i>unc-70(n493);zdfs5</i>                                                       | 1DOA  | 18        | 309 |
| QH5436  | <i>tbc-10(vd31);unc-70(n493);zdfs5</i>                                          | 1DOA  | 111       | 164 |
| QH5878  | <i>tbc-10(tm2907);unc-70(n493);zdfs5</i>                                        | 1DOA  | 81        | 138 |
| QH5967  | <i>tbc-10(tm2790);unc-70(n493);zdfs5</i>                                        | 1DOA  | 26        | 70  |
| QH5981  | <i>rab-35(b1013); unc-70(n493); zdfs5</i>                                       | 1DOA  | 3         | 104 |
| QH5956  | <i>rab-35(b1013); tbc-10(vd31); unc-70(n493); zdfs5</i>                         | 1DOA  | 19        | 130 |
| QH6400  | <i>rme-4(b1001); tbc-10(vd31); unc-70(n493); zdfs5</i>                          | 1DOA  | 96        | 243 |
| QH7764  | <i>flcn-1(ok975); tbc-10(vd31); unc-70(n493); zdfs5</i>                         | 1DOA  | 93        | 155 |
| QH7778  | <i>rme-4(b1001); flcn-1(ok975); tbc-10(vd31); unc-70(n493); zdfs5</i>           | 1DOA  | 39        | 120 |
| QH6753  | <i>vdSi2(Pdpy-7::unc-70(n493)::mKate2); zdfs5</i>                               | 1DOA  | 10        | 71  |
| QH6693  | <i>vdSi2(Pdpy-7::unc-70(n493)::mKate2); tbc-10(vd31); zdfs5</i>                 | 1DOA  | 65        | 111 |
| QH6858  | <i>vdSi10(Pdpy-7::unc-70(n493)::mKate2); zdfs5</i>                              | 1DOA  | 2         | 45  |
| QH6785  | <i>vdSi10(Pdpy-7::unc-70(n493)::mKate2); tbc-10(vd31); zdfs5</i>                | 1DOA  | 63        | 74  |
| QH6734  | <i>vdSi3(Pdpy-7::unc-70(WT)::mKate2); zdfs5</i>                                 | 1DOA  | 4         | 88  |
| QH6787  | <i>vdSi3(Pdpy-7::unc-70(WT)::mKate2); tbc-10(vd31); zdfs5</i>                   | 1DOA  | 32        | 109 |
| QH7203  | <i>vdSi3(Pdpy-7::unc-70(WT)::mKate2); tbc-10(vd31); unc-70(n493); zdfs5</i>     | 1DOA  | 35        | 111 |
| QH7034  | <i>vdSi16(Pmec-4::unc-70(n493)::mKate2); tbc-10; zdfs5</i>                      | 1DOA  | 3         | 73  |
| QH7035  | <i>vdSi17(Pmec-4::unc-70(n493)::mKate2); tbc-10; zdfs5</i>                      | 1DOA  | 2         | 74  |
| QH7282  | <i>unc-54(e1009); tbc-10 (vd31); vdSi2[Pdpy-7::unc-70(n493)::mKate2]; zdfs4</i> | 1DOA  | 5         | 101 |
| QH7823  | <i>egl-4(ad450); vdSi2(Pdpy-7::unc-70(n493)::mKate2); tbc-10(vd31); zdfs5</i>   | 1DOA  | 52        | 122 |
| QH7842  | <i>acy-1(ce2); vdSi2[Pdpy-7::unc-70(n493)::mKate2]; tbc-10(vd31); zdfs5</i>     | 1DOA  | 69        | 89  |
| QH6884  | <i>oxls95(Ppdi-2::unc-70); zdfs5</i>                                            | 1DOA  | 11        | 133 |
| QH6885  | <i>oxls95(Ppdi-2::unc-70); tbc-10(vd31); zdfs5</i>                              | 1DOA  | 24        | 119 |
| QH6886  | <i>oxls95(Ppdi-2::unc-70); unc-70(n493); zdfs5</i>                              | 1DOA  | 2         | 42  |
| QH5877  | <i>oxls95(Ppdi-2::unc-70); tbc-10(vd31); unc-70(n493); zdfs5</i>                | 1DOA  | 35        | 102 |
| CZ10175 | <i>zdfs5</i>                                                                    | 3DOA  | 2         | 75  |
| QH5834  | <i>tbc-10(vd31)</i>                                                             | 3DOA  | 0         | 32  |
| QH6000  | <i>tbc-10(vd31); mec-17(ok2109); zdfs5</i>                                      | 3DOA  | 23        | 110 |
| QH6001  | <i>mec-17(ok2109); zdfs5</i>                                                    | 3DOA  | 26        | 106 |
| QH6473  | <i>unc-70(s1502); basls1(Punc-17::unc-70); zdfs5</i>                            | 1DOA  | 6         | 73  |
| QH6476  | <i>tbc-10(vd31); unc-70(s1502); basls1(Punc-17::unc-70); zdfs5</i>              | 1DOA  | 21        | 102 |

### Supplementary Table 1.

All genetic mutants and stable transgenic strains used listed together with observed axonal breakage incidence for the PLM neuron.



| Strain | Genotype                                                                                                            | Stage | Transgenic |     | Non- Transgenic |     |
|--------|---------------------------------------------------------------------------------------------------------------------|-------|------------|-----|-----------------|-----|
|        |                                                                                                                     |       | PLM Break  | n   | PLM Break       | n   |
| QH5718 | <i>tbc-10(vd31); unc-70(n493); zdls5(Pmec-4::GFP); vdEx1211 [Ptbc-10::tbc-10 1 ng/μL]</i>                           | 1DOA  | 6          | 87  | 65              | 91  |
| QH5719 | <i>tbc-10(vd31); unc-70(n493); zdls5(Pmec-4::GFP); vdEx1212 [Ptbc-10::tbc-10 1 ng/μL]</i>                           | 1DOA  | 4          | 134 | 124             | 176 |
| QH5731 | <i>tbc-10(vd31); unc-70(n493); zdls5(Pmec-4::GFP); vdEx1223 [Ptbc-10::tbc-10 1 ng/μL]</i>                           | 1DOA  | 4          | 133 | 94              | 142 |
| QH5678 | <i>tbc-10(vd31); unc-70(n493); zdls5(Pmec-4::GFP); vdEx1188 [Ptbc-10::tbc-10 10 ng/μL]</i>                          | 1DOA  | 1          | 104 | 31              | 46  |
| QH5679 | <i>tbc-10(vd31); unc-70(n493); zdls5(Pmec-4::GFP); vdEx1189 [Ptbc-10::tbc-10 10 ng/μL]</i>                          | 1DOA  | 3          | 108 | 46              | 90  |
| QH5680 | <i>tbc-10(vd31); unc-70(n493); zdls5(Pmec-4::GFP); vdEx1190 [Ptbc-10::tbc-10 10 ng/μL]</i>                          | 1DOA  | 2          | 107 | 51              | 103 |
| QH5681 | <i>tbc-10(vd31); unc-70(n493); zdls5(Pmec-4::GFP); vdEx1191 [Ptbc-10::tbc-10 10 ng/μL]</i>                          | 1DOA  | 4          | 94  | 56              | 100 |
| QH5722 | <i>tbc-10(vd31); unc-70(n493); zdls5(Pmec-4::GFP); vdEx1215 [Pdpy-7::tbc-10 10 ng/μL]</i>                           | 1DOA  | 2          | 101 | 49              | 66  |
| QH5724 | <i>tbc-10(vd31); unc-70(n493); zdls5(Pmec-4::GFP); vdEx1216 [Pdpy-7::tbc-10 10 ng/μL]</i>                           | 1DOA  | 0          | 39  | 17              | 48  |
| QH5726 | <i>tbc-10(vd31); unc-70(n493); zdls5(Pmec-4::GFP); vdEx1218 [Pdpy-7::tbc-10 10 ng/μL]</i>                           | 1DOA  | 6          | 77  | 41              | 71  |
| QH5738 | <i>tbc-10(vd31); unc-70(n493); zdls5(Pmec-4::GFP); vdEx1228 [Pmec-4::tbc-10 5 ng/μL]</i>                            | 1DOA  | 60         | 101 | 57              | 95  |
| QH5739 | <i>tbc-10(vd31); unc-70(n493); zdls5(Pmec-4::GFP); vdEx1229 [Pmec-4::tbc-10 5 ng/μL]</i>                            | 1DOA  | 57         | 99  | 35              | 63  |
| QH5717 | <i>tbc-10(vd31); unc-70(n493); zdls5(Pmec-4::GFP); vdEx1210 [Pmec-4::tbc-10 10 ng/μL]</i>                           | 1DOA  | 33         | 48  | 42              | 72  |
| QH5728 | <i>tbc-10(vd31); unc-70(n493); zdls5(Pmec-4::GFP); vdEx1220 [Pmec-4::tbc-10 10 ng/μL]</i>                           | 1DOA  | 40         | 70  | 56              | 101 |
| QH5729 | <i>tbc-10(vd31); unc-70(n493); zdls5(Pmec-4::GFP); vdEx1221 [Pmec-4::tbc-10 10 ng/μL]</i>                           | 1DOA  | 45         | 101 | 54              | 100 |
| QH6017 | <i>tbc-10(vd31); unc-70(n493); zdls5(Pmec-4::GFP); vdEx1357 [Pmyo-3::tbc-10 10 ng/μL]</i>                           | 1DOA  | 22         | 36  | 34              | 49  |
| QH6018 | <i>tbc-10(vd31); unc-70(n493); zdls5(Pmec-4::GFP); vdEx1358 [Pmyo-3::tbc-10 10 ng/μL]</i>                           | 1DOA  | 23         | 42  | 53              | 64  |
| QH6019 | <i>tbc-10(vd31); unc-70(n493); zdls5(Pmec-4::GFP); vdEx1359 [Pmyo-3::tbc-10 10 ng/μL]</i>                           | 1DOA  | 31         | 48  | 35              | 47  |
| QH7053 | <i>tbc-10(vd31); unc-70(n493); zdls5(Pmec-4::GFP); vdEx1826 [Pdpy-7::htbc1d10a 5 ng/μL]</i>                         | 1DOA  | 9          | 93  | 68              | 102 |
| QH7054 | <i>tbc-10(vd31); unc-70(n493); zdls5(Pmec-4::GFP); vdEx1827 [Pdpy-7::htbc1d10a 5 ng/μL]</i>                         | 1DOA  | 10         | 138 | 59              | 94  |
| QH7055 | <i>tbc-10(vd31); unc-70(n493); zdls5(Pmec-4::GFP); vdEx1828 [Pdpy-7::htbc1d10a 5 ng/μL]</i>                         | 1DOA  | 19         | 85  | 54              | 89  |
| QH7367 | <i>tbc-10(vd31); unc-70(n493); zdls5(Pmec-4::GFP); vdEx2007 [Pdpy-7::htbc1d10b 5 ng/μL]</i>                         | 1DOA  | 20         | 99  | 64              | 113 |
| QH7368 | <i>tbc-10(vd31); unc-70(n493); zdls5(Pmec-4::GFP); vdEx2008 [Pdpy-7::htbc1d10b 5 ng/μL]</i>                         | 1DOA  | 24         | 98  | 60              | 115 |
| QH7369 | <i>tbc-10(vd31); unc-70(n493); zdls5(Pmec-4::GFP); vdEx2009 [Pdpy-7::htbc1d10b 5 ng/μL]</i>                         | 1DOA  | 46         | 124 | 61              | 98  |
| QH7370 | <i>tbc-10(vd31); unc-70(n493); zdls5(Pmec-4::GFP); vdEx2010 [Pdpy-7::htbc1d10b 5 ng/μL]</i>                         | 1DOA  | 59         | 92  | 51              | 92  |
| QH7056 | <i>tbc-10(vd31); unc-70(n493); zdls5(Pmec-4::GFP); vdEx1829 [Pdpy-7::htbc1d10c 5 ng/μL]</i>                         | 1DOA  | 68         | 96  | 56              | 82  |
| QH7057 | <i>tbc-10(vd31); unc-70(n493); zdls5(Pmec-4::GFP); vdEx1830 [Pdpy-7::htbc1d10c 5 ng/μL]</i>                         | 1DOA  | 36         | 76  | 44              | 68  |
| QH7058 | <i>tbc-10(vd31); unc-70(n493); zdls5(Pmec-4::GFP); vdEx1831 [Pdpy-7::htbc1d10c 5 ng/μL]</i>                         | 1DOA  | 59         | 107 | 31              | 53  |
| QH7083 | <i>tbc-10(vd31); unc-70(n493); zdls5(Pmec-4::GFP); vdEx1844 [Pdpy-7::htbc1d10c 5 ng/μL]</i>                         | 1DOA  | 52         | 97  | 62              | 94  |
| QH7084 | <i>tbc-10(vd31); unc-70(n493); zdls5(Pmec-4::GFP); vdEx1845 [Pdpy-7::htbc1d10c 5 ng/μL]</i>                         | 1DOA  | 41         | 118 | 54              | 109 |
| QH7085 | <i>tbc-10(vd31); unc-70(n493); zdls5(Pmec-4::GFP); vdEx1846 [Pdpy-7::htbc1d10c 5 ng/μL]</i>                         | 1DOA  | 24         | 39  | 16              | 27  |
| QH7086 | <i>tbc-10(vd31); unc-70(n493); zdls5(Pmec-4::GFP); vdEx1847 [Pdpy-7::htbc1d10c 5 ng/μL]</i>                         | 1DOA  | 40         | 63  | 32              | 58  |
| QH6245 | <i>rab-35(b1013); tbc-10(vd31); unc-70(n493); zdls5(Pmec-4::GFP); vdEx1454 [Pdpy-7::rab-35cDNA(WT) 0.5 ng/μL]</i>   | 1DOA  | 2          | 22  | 5               | 30  |
| QH6262 | <i>rab-35(b1013); tbc-10(vd31); unc-70(n493); zdls5(Pmec-4::GFP); vdEx1458 [Pdpy-7::rab-35cDNA(WT) 0.2 ng/μL]</i>   | 1DOA  | 15         | 104 | 21              | 106 |
| QH6263 | <i>rab-35(b1013); tbc-10(vd31); unc-70(n493); zdls5(Pmec-4::GFP); vdEx1459 [Pdpy-7::rab-35cDNA(WT) 0.2 ng/μL]</i>   | 1DOA  | 98         | 120 | 24              | 87  |
| QH6264 | <i>rab-35(b1013); tbc-10(vd31); unc-70(n493); zdls5(Pmec-4::GFP); vdEx1460 [Pdpy-7::rab-35cDNA(WT) 0.2 ng/μL]</i>   | 1DOA  | 28         | 117 | 16              | 80  |
| QH6265 | <i>rab-35(b1013); tbc-10(vd31); unc-70(n493); zdls5(Pmec-4::GFP); vdEx1461 [Pdpy-7::rab-35cDNA(WT) 0.2 ng/μL]</i>   | 1DOA  | 22         | 86  | 19              | 102 |
| QH6224 | <i>rab-35(b1013); tbc-10(vd31); unc-70(n493); zdls5(Pmec-4::GFP); vdEx1445 [Pdpy-7::rab-35cDNA(S24N) 0.5 ng/μL]</i> | 1DOA  | 20         | 41  | 49              | 73  |
| QH6225 | <i>rab-35(b1013); tbc-10(vd31); unc-70(n493); zdls5(Pmec-4::GFP); vdEx1446 [Pdpy-7::rab-35cDNA(S24N) 0.5 ng/μL]</i> | 1DOA  | 18         | 34  | 28              | 56  |
| QH6227 | <i>rab-35(b1013); tbc-10(vd31); unc-70(n493); zdls5(Pmec-4::GFP); vdEx1448 [Pdpy-7::rab-35cDNA(S24N) 0.5 ng/μL]</i> | 1DOA  | 15         | 57  | 40              | 75  |
| QH6228 | <i>rab-35(b1013); tbc-10(vd31); unc-70(n493); zdls5(Pmec-4::GFP); vdEx1449 [Pdpy-7::rab-35cDNA(S24N) 0.5 ng/μL]</i> | 1DOA  | 30         | 41  | 24              | 43  |

|        |                                                                                                                                   |      |    |     |     |     |
|--------|-----------------------------------------------------------------------------------------------------------------------------------|------|----|-----|-----|-----|
| QH6266 | <i>rab-35(b1013); tbc-10(vd31); unc-70(n493); zds5(Pmec-4::GFP); vdEx1462 [Pdpy-7::rab-35cDNA(S24N) 5 ng/μL]</i>                  | 1DOA | 18 | 41  | 30  | 53  |
| QH6267 | <i>rab-35(b1013); tbc-10(vd31); unc-70(n493); zds5(Pmec-4::GFP); vdEx1463 [Pdpy-7::rab-35cDNA(S24N) 5 ng/μL]</i>                  | 1DOA | 27 | 93  | 58  | 87  |
| QH6268 | <i>rab-35(b1013); tbc-10(vd31); unc-70(n493); zds5(Pmec-4::GFP); vdEx1464 [Pdpy-7::rab-35cDNA(S24N) 5 ng/μL]</i>                  | 1DOA | 20 | 63  | 66  | 96  |
| QH6269 | <i>rab-35(b1013); tbc-10(vd31); unc-70(n493); zds5(Pmec-4::GFP); vdEx1465 [Pdpy-7::rab-35cDNA(S24N) 5 ng/μL]</i>                  | 1DOA | 17 | 47  | 53  | 72  |
| QH7812 | <i>rab-35(b1013); tbc-10(vd31); unc-70(n493); zds5(Pmec-4::GFP); vdEx2195[Pdpy-7::rab-35(Q69L)cDNA 0.5 ng/μL]</i>                 | 1DOA | 8  | 23  | 12  | 41  |
| QH7813 | <i>rab-35(b1013); tbc-10(vd31); unc-70(n493); zds5(Pmec-4::GFP); vdEx2196[Pdpy-7::rab-35(Q69L)cDNA 0.5 ng/μL]</i>                 | 1DOA | 38 | 47  | 21  | 100 |
| QH7814 | <i>rab-35(b1013); tbc-10(vd31); unc-70(n493); zds5(Pmec-4::GFP); vdEx2197[Pdpy-7::rab-35(Q69L)cDNA 0.5 ng/μL]</i>                 | 1DOA | 56 | 95  | 40  | 153 |
| QH7059 | <i>rab-35(b1013); tbc-10(vd31); unc-70(n493); zds5(Pmec-4::GFP); vdEx1832 [Pdpy-7::hrab35cDNA(WT) 0.2 ng/μL]</i>                  | 1DOA | 13 | 72  | 12  | 103 |
| QH7060 | <i>rab-35(b1013); tbc-10(vd31); unc-70(n493); zds5(Pmec-4::GFP); vdEx1833 [Pdpy-7::hrab35cDNA(WT) 0.2 ng/μL]</i>                  | 1DOA | 15 | 31  | 4   | 41  |
| QH7061 | <i>rab-35(b1013); tbc-10(vd31); unc-70(n493); zds5(Pmec-4::GFP); vdEx1834 [Pdpy-7::hrab35cDNA(WT) 0.2 ng/μL]</i>                  | 1DOA | 48 | 64  | 12  | 73  |
| QH7062 | <i>rab-35(b1013); tbc-10(vd31); unc-70(n493); zds5(Pmec-4::GFP); vdEx1835 [Pdpy-7::hrab35cDNA(WT) 0.2 ng/μL]</i>                  | 1DOA | 8  | 70  | 15  | 94  |
| QH7787 | <i>tbc-10(vd31); unc-70(n493); zds5(Pmec-4::GFP); vdEx2176[Pdpy-7::human_rab-35(S22N)cDNA 0.2 ng/μL]</i>                          | 1DOA | 49 | 106 | 106 | 137 |
| QH7788 | <i>tbc-10(vd31); unc-70(n493); zds5(Pmec-4::GFP); vdEx2177[Pdpy-7::human_rab-35(S22N)cDNA 0.2 ng/μL]</i>                          | 1DOA | 47 | 94  | 49  | 68  |
| QH7789 | <i>tbc-10(vd31); unc-70(n493); zds5(Pmec-4::GFP); vdEx2178[Pdpy-7::human_rab-35(S22N)cDNA 0.2 ng/μL]</i>                          | 1DOA | 75 | 117 | 32  | 48  |
| QH7790 | <i>tbc-10(vd31); unc-70(n493); zds5(Pmec-4::GFP); vdEx2179[Pdpy-7::human_rab-35(S22N)cDNA 0.2 ng/μL]</i>                          | 1DOA | 39 | 64  | 41  | 69  |
| QH7791 | <i>tbc-10(vd31); unc-70(n493); zds5(Pmec-4::GFP); vdEx2180[Pdpy-7::human_rab-35(S22N)cDNA 0.2 ng/μL]</i>                          | 1DOA | 39 | 60  | 30  | 52  |
| QH7815 | <i>rab-35(b1013); (tbc-10(vd31); unc-70(n493); zds5(Pmec-4::GFP); vdEx2198[Pdpy-7::human_rab-35(Q67L)cDNA 0.2 ng/μL]</i>          | 1DOA | 89 | 145 | 29  | 162 |
| QH7816 | <i>rab-35(b1013); (tbc-10(vd31); unc-70(n493); zds5(Pmec-4::GFP); vdEx2199[Pdpy-7::human_rab-35(Q67L)cDNA 0.2 ng/μL]</i>          | 1DOA | 43 | 119 | 10  | 78  |
| QH7817 | <i>rab-35(b1013); (tbc-10(vd31); unc-70(n493); zds5(Pmec-4::GFP); vdEx2200[Pdpy-7::human_rab-35(Q67L)cDNA 0.2 ng/μL]</i>          | 1DOA | 7  | 34  | 7   | 45  |
| QH7818 | <i>rab-35(b1013); (tbc-10(vd31); unc-70(n493); zds5(Pmec-4::GFP); vdEx2201[Pdpy-7::human_rab-35(Q67L)cDNA 0.2 ng/μL]</i>          | 1DOA | 6  | 55  | 10  | 58  |
| QH7819 | <i>rab-35(b1013); (tbc-10(vd31); unc-70(n493); zds5(Pmec-4::GFP); vdEx2202[Pdpy-7::human_rab-35(Q67L)cDNA 0.2 ng/μL]</i>          | 1DOA | 3  | 43  | 11  | 77  |
| QH6524 | <i>tbc-10(vd31); zds5(Pmec-4::GFP); vdEx1537[Pdpy-7::spc-1(1-170)::mCherry 5 ng/μL]</i>                                           | 1DOA | 0  | 44  | 0   | 9   |
| QH6525 | <i>tbc-10(vd31); zds5(Pmec-4::GFP); vdEx1538[Pdpy-7::spc-1(1-170)::mCherry 5 ng/μL]</i>                                           | 1DOA | 2  | 49  | 0   | 35  |
| QH6526 | <i>tbc-10(vd31); zds5(Pmec-4::GFP); vdEx1539[Pdpy-7::spc-1(1-170)::mCherry 5 ng/μL]</i>                                           | 1DOA | 1  | 66  | 0   | 30  |
| QH6528 | <i>tbc-10(vd31); zds5(Pmec-4::GFP); vdEx1541[Pdpy-7::spc-1(1-170)::mCherry 5 ng/μL]</i>                                           | 1DOA | 2  | 42  | 0   | 50  |
| QH6529 | <i>tbc-10(vd31); zds5(Pmec-4::GFP); vdEx1542[Pdpy-7::spc-1(1-170)::mCherry 5 ng/μL]</i>                                           | 1DOA | 2  | 99  | 0   | 47  |
| QH6530 | <i>tbc-10(vd31); zds5(Pmec-4::GFP); vdEx1543[Pdpy-7::spc-1(1-170)::mCherry 10 ng/μL]</i>                                          | 1DOA | 2  | 69  | 0   | 28  |
| QH6531 | <i>tbc-10(vd31); zds5(Pmec-4::GFP); vdEx1544[Pdpy-7::spc-1(1-170)::mCherry 10 ng/μL]</i>                                          | 1DOA | 0  | 63  | 0   | 38  |
| QH6534 | <i>tbc-10(vd31); zds5(Pmec-4::GFP); vdEx1547[Pdpy-7::spc-1(1-170)::mCherry 10 ng/μL]</i>                                          | 1DOA | 1  | 72  | 0   | 42  |
| QH6519 | <i>tbc-10(vd31); zds5(Pmec-4::GFP); vdEx1532[Pmec-17::spc-1(1-170)::mCherry 5 ng/μL]</i>                                          | 1DOA | 0  | 83  | 0   | 66  |
| QH6520 | <i>tbc-10(vd31); zds5(Pmec-4::GFP); vdEx1533[Pmec-17::spc-1(1-170)::mCherry 5 ng/μL]</i>                                          | 1DOA | 0  | 58  | 1   | 76  |
| QH6521 | <i>tbc-10(vd31); zds5(Pmec-4::GFP); vdEx1534[Pmec-17::spc-1(1-170)::mCherry 10 ng/μL]</i>                                         | 1DOA | 1  | 174 | 0   | 119 |
| QH6522 | <i>tbc-10(vd31); zds5(Pmec-4::GFP); vdEx1535[Pmec-17::spc-1(1-170)::mCherry 10 ng/μL]</i>                                         | 1DOA | 0  | 68  | 0   | 40  |
| QH6523 | <i>tbc-10(vd31); zds5(Pmec-4::GFP); vdEx1536[Pmec-17::spc-1(1-170)::mCherry 10 ng/μL]</i>                                         | 1DOA | 0  | 216 | 1   | 104 |
| QH6657 | <i>tbc-10(vd31); zds5(Pmec-4::GFP); vdEx1603[Pdpy-7::spc-1(1-170)::mCherry 5ng/μL + Pmec-17::spc-1(1-170)::mCherry 5 ng/μL]</i>   | 1DOA | 2  | 73  | 1   | 14  |
| QH6658 | <i>tbc-10(vd31); zds5(Pmec-4::GFP); vdEx1604[Pdpy-7::spc-1(1-170)::mCherry 5ng/μL + Pmec-17::spc-1(1-170)::mCherry 5 ng/μL]</i>   | 1DOA | 0  | 33  | 0   | 40  |
| QH6659 | <i>tbc-10(vd31); zds5(Pmec-4::GFP); vdEx1605[Pdpy-7::spc-1(1-170)::mCherry 5ng/μL + Pmec-17::spc-1(1-170)::mCherry 5 ng/μL]</i>   | 1DOA | 2  | 66  | 0   | 25  |
| QH6660 | <i>tbc-10(vd31); zds5(Pmec-4::GFP); vdEx1606[Pdpy-7::spc-1(1-170)::mCherry 5ng/μL + Pmec-17::spc-1(1-170)::mCherry 5 ng/μL]</i>   | 1DOA | 2  | 48  | 1   | 19  |
| QH6661 | <i>tbc-10(vd31); zds5(Pmec-4::GFP); vdEx1607[Pdpy-7::spc-1(1-170)::mCherry 10ng/μL + Pmec-17::spc-1(1-170)::mCherry 10 ng/μL]</i> | 1DOA | 2  | 65  | 0   | 46  |
| QH6662 | <i>tbc-10(vd31); zds5(Pmec-4::GFP); vdEx1608[Pdpy-7::spc-1(1-170)::mCherry 10ng/μL + Pmec-17::spc-1(1-170)::mCherry 10 ng/μL]</i> | 1DOA | 0  | 44  | 0   | 11  |
| QH6663 | <i>tbc-10(vd31); zds5(Pmec-4::GFP); vdEx1609[Pdpy-7::spc-1(1-170)::mCherry 10ng/μL + Pmec-17::spc-1(1-170)::mCherry 10 ng/μL]</i> | 1DOA | 0  | 41  | 0   | 66  |
| QH6664 | <i>tbc-10(vd31); zds5(Pmec-4::GFP); vdEx1610[Pdpy-7::spc-1(1-170)::mCherry 10ng/μL + Pmec-17::spc-1(1-170)::mCherry 10 ng/μL]</i> | 1DOA | 1  | 21  | 0   | 23  |
| QH6665 | <i>tbc-10(vd31); zds5(Pmec-4::GFP); vdEx1611[Pdpy-7::spc-1(1-170)::mCherry 10ng/μL + Pmec-17::spc-1(1-170)::mCherry 10 ng/μL]</i> | 1DOA | 1  | 73  | 0   | 40  |

## Supplementary Table 2.

All semi-stable transgenic strains used listed together with observed axonal breakage incidence for the PLM neuron in transgenic and non-transgenic siblings.

| Plasmid               | Feature                                      | Backbone                                            | Insert                                                     | Reagents                                                                                                                                                                                                                                                                                           | Cloning method            | Enzymes       | Source          |
|-----------------------|----------------------------------------------|-----------------------------------------------------|------------------------------------------------------------|----------------------------------------------------------------------------------------------------------------------------------------------------------------------------------------------------------------------------------------------------------------------------------------------------|---------------------------|---------------|-----------------|
| pSC8                  | Ptbc-10::gfp                                 | pNV Punc-25::GFP                                    | PCR generated<br>gDNA template                             | Ptbc-10 F 5'-gttcagcggccgcaattgatattagctcaco-3'<br>Ptbc-10 R 5'-ctgcagcgtacgctggaagaaaacggcgata-3'                                                                                                                                                                                                 | Restriction digest        | NotI/NheI     | This work       |
| pSC11                 | Pdpy-7::tbc-10                               | Pdpy-7::unc-54(3'UTR)                               | PCR generated<br>gDNA template                             | tbc-10 F 5'-atcagcgtacgctgcaaatctaccaccc-3'<br>tbc-10 R 5'-gacgctgacacctcaaatctaccat-3'                                                                                                                                                                                                            | Restriction digest        | NheI/KpnI     | This work       |
| pSC12                 | Ptbc-10::tbc-10                              | pSC11 Pdpy-7::tbc-10                                | pSC8 Ptbc-10::gfp                                          | -                                                                                                                                                                                                                                                                                                  | Restriction digest        | HindIII/NheI  | This work       |
| pSC13                 | Pmec-4::tbc-10                               | pSC11 Pdpy-7::tbc-10                                | Pmec-4::unc-54(3'UTR)                                      | -                                                                                                                                                                                                                                                                                                  | Restriction digest        | BamHI/HindIII | This work       |
| pSC14                 | Pmyo-3::tbc-10                               | pSC11 Pdpy-7::tbc-10                                | Pmyo-3::unc-54(3'UTR)                                      | -                                                                                                                                                                                                                                                                                                  | Restriction digest        | BamHI/HindIII | This work       |
| pFR8                  | Pdpy-7::tbc1d10a                             | Pdpy-7::unc-54(3'UTR)                               | gBlock (IDT)                                               | tbc1d10a (NM_031937) with 30bp homology regions<br>5'-taacatagaacatttcaggaggacccttgctagc-3' at the 5' end<br>5'-ggtaaccggtgaccaactgaagccggtgctgacct-3' at the 3' end                                                                                                                               | Gibson assembly           | NheI/KpnI     | This work       |
| pKG1                  | Pdpy-7::tbc1d10b                             | Pdpy-7::unc-54(3'UTR)                               | PCR generated<br>(nested)<br>OHu07035 template             | tbc1d10b outer F 5'-tggaggtctataaagcagag-3'<br>tbc1d10b outer R 5'-tagaagcagcagctgagg-3'<br>tbc1d10b inner F 5'-atttcaggaggacccttgatggagacggcgagcggcg-3'<br>tbc1d10b inner R 5'-gctcagttgctaccggtctcagaagtaagcgtcctgccc-3'                                                                         | Gibson assembly           | NheI/KpnI     | This work       |
| pFR9                  | Pdpy-7::tbc1d10c                             | Pdpy-7::unc-54(3'UTR)                               | gBlock (IDT)                                               | tbc1d10c (NM_198517; codon optimized) with 30bp homology regions<br>5'-taacatagaacatttcaggaggacccttgctagc-3' at the 5' end<br>5'-ggtaaccggtgaccaactgaagccggtgctgacct-3' at the 3' end                                                                                                              | Gibson assembly           | NheI/KpnI     | This work       |
| OHu07035              | tbc1d10b                                     | -                                                   | -                                                          | -                                                                                                                                                                                                                                                                                                  | -                         | -             | Genscript (USA) |
| mg356                 | Pmec-17::spc-1(DN)::mCherry                  | -                                                   | -                                                          | -                                                                                                                                                                                                                                                                                                  | -                         | -             | Miriam Goodman  |
| pSC22                 | Pdpy-7::spc-1(DN)::mCherry                   | Pdpy-7::unc-54(3'UTR)                               | mg356 Pmec-17::spc-1(DN)::mCherry                          | -                                                                                                                                                                                                                                                                                                  | Restriction digest        | BamHI/PacI    | This work       |
| pSC19                 | Pdpy-7::rab-35                               | pSC11 Pdpy-7::tbc-10                                | PCR generated<br>pID3.01::rab-35 template                  | rab-35 F 5'-gacatcgtcagcagcgggaactcgggatac-3'<br>rab-35 R 5'-gagcgtgaccttaccacattgacctctttc-3'                                                                                                                                                                                                     | Restriction digest        | NheI/KpnI     | This work       |
| pSC20                 | Pdpy-7::rab-35(S24N)                         | pSC11 Pdpy-7::tbc-10                                | PCR generated<br>pID3.01::rab-35(S24N) template            | rab-35 F 5'-gacatcgtcagcagcgggaactcgggatac-3'<br>rab-35 R 5'-gagcgtgaccttaccacattgacctctttc-3'                                                                                                                                                                                                     | Restriction digest        | NheI/KpnI     | This work       |
| pSC21                 | Pdpy-7::rab-35(Q69L)                         | pSC11 Pdpy-7::tbc-10                                | PCR generated<br>pID3.01::rab-35(Q69L) template            | rab-35 F 5'-gacatcgtcagcagcgggaactcgggatac-3'<br>rab-35 R 5'-gagcgtgaccttaccacattgacctctttc-3'                                                                                                                                                                                                     | Restriction digest        | NheI/KpnI     | This work       |
| pID3.01::rab-35       | rab-35                                       | -                                                   | -                                                          | -                                                                                                                                                                                                                                                                                                  | -                         | -             | Barth Grant     |
| pID3.01::rab-35(S24N) | rab-35(S24N)                                 | -                                                   | -                                                          | -                                                                                                                                                                                                                                                                                                  | -                         | -             | Barth Grant     |
| pID3.01::rab-35(Q69L) | rab-35(Q69L)                                 | -                                                   | -                                                          | -                                                                                                                                                                                                                                                                                                  | -                         | -             | Barth Grant     |
| pFR7                  | Pdpy-7::hrab35                               | Pdpy-7::unc-54(3'UTR)                               | gBlock (IDT)                                               | rab35 (NM_006861) with 30bp overlaps<br>5'-taacatagaacatttcaggaggacccttgctagc-3' at the 5' end<br>5'-ggtaaccggtgaccaactgaagccggtgctgacct-3' at the 3' end                                                                                                                                          | Gibson assembly           | NheI/KpnI     | This work       |
| pFR10                 | Pdpy-7::hrab35(Q67L)                         | Pdpy-7::hrab35                                      | -                                                          | hrab35 Q67L QCF 5'-ggaagcgtccagcccgctg-3'<br>hrab35 Q67L QCR 5'-cacagcgggctgagcgtcc-3'                                                                                                                                                                                                             | Site-directed Mutagenesis | -             | This work       |
| pFR11                 | Pdpy-7::hrab35(S22N)                         | Pdpy-7::hrab35                                      | -                                                          | hrab35 S22N QCF 5'-cgcaaacgaaatcttctgcccacaaccg-3'<br>hrab35 S22N QCR 5'-gcccgtggaagaaacagtttactgtg-3'                                                                                                                                                                                             | Site-directed Mutagenesis | -             | This work       |
| pSC23                 | Pdpy-7::mKate::rab-35(WT)                    | PCR generated<br>pSJ9061Pdpy-7::rab-35(WT) template | PCR generated<br>pSJ9061Pmyo-3::mKate2 template            | vector F 5'-catgttctctgagctcgggagcagctgaccttctgcaaaaatgaaagaat-3'<br>vector R 5'-gcccgttctgagcctctctcaagctcagcgggagcagcgttaccgatacgtatcgtt-3'<br>Insert F 5'-atcttaccattgtccagataaggatcctgctcagcagctcacaaggagaaacatg-3'<br>Insert R 5'-gaacaaatgatcgtatctccaggttcccgctcagcgtgagggatcagtaaccgggc-3' | -                         | -             | Steven Zuny     |
| pSJ9061               | Pmyo-3::mKate2                               | -                                                   | -                                                          | -                                                                                                                                                                                                                                                                                                  | -                         | -             | Steven Zuny     |
| pSC15                 | Ptbc10::gfp-c1*sec*3xflag::tbc-10            | pDD282 GFP*SEC*3xFlag                               | PCR generated<br>gDNA template                             | 5' arm F 5'-acgtgtgaaacagcggcagctcggccacaactcggcagataga-3'<br>5' arm R 5'-tccagtgaaacttctcttactctggaagaaaacggcacaact-3'<br>3' arm F 5'-cgtgatacaagagcagctgacaagaagcaactctcaaccca-3'<br>3' arm R 5'-tcacacagaacagcgtatgacctgatacattggcctccagat-3'                                                   | Gibson assembly           | ClaI/SpeI     | This work       |
| pDD282                | GFP*SEC*3xFlag                               | -                                                   | -                                                          | -                                                                                                                                                                                                                                                                                                  | -                         | -             | Bob Goldstein   |
| pSC16                 | Peft-3::cas9 + tbc-10 sgRNA                  | pDD162 Peft-3::cas9                                 | -                                                          | tbc-10 sgRNA F 5'-agatgctgtagtgccattgtagaggtttagagctaga-3'<br>tbc-10 sgRNA R 5'-gctcaaaacccctcaaatggaactacacagactctcgaa-3'                                                                                                                                                                         | Site-directed Mutagenesis | -             | This work       |
| pDD162                | Peft-3::cas9                                 | -                                                   | -                                                          | -                                                                                                                                                                                                                                                                                                  | -                         | -             | Bob Goldstein   |
| pGH8                  | Prab-3::mCherry                              | -                                                   | -                                                          | -                                                                                                                                                                                                                                                                                                  | -                         | -             | Erik Jorgensen  |
| pCFJ104               | Pmyo-3::mCherry                              | -                                                   | -                                                          | -                                                                                                                                                                                                                                                                                                  | -                         | -             | Erik Jorgensen  |
| pCFJ90                | Pmyo-2::mCherry                              | -                                                   | -                                                          | -                                                                                                                                                                                                                                                                                                  | -                         | -             | Erik Jorgensen  |
| pSC24                 | Pdpy-7::unc-70                               | Pdpy-7::unc-54(3'UTR)                               | PCR generated<br>PK133 venus::unc-70 template              | unc-70 F 5'-agctacccggatggcctgctgacggcaatcaggcc-3'<br>unc-70 R 5'-ctagcagctgaccttctcctgagagaaaatc-3'                                                                                                                                                                                               | Restriction digest        | XmaI/NheI     | This work       |
| PK133                 | venus::unc-70                                | -                                                   | -                                                          | -                                                                                                                                                                                                                                                                                                  | -                         | -             | Kang Shen       |
| pSC25                 | Pdpy-7::unc-70(DN)                           | pSC24 Pdpy-7::unc-70                                | -                                                          | unc-70(DN) F 5'-cgaagaacatcaaacccaagaacacagcagg-3'<br>unc-70(DN) R 5'-cctcgttctctgaggtttgaggttctctg-3'                                                                                                                                                                                             | Site-directed Mutagenesis | -             | This work       |
| pSC26                 | Pdpy-7::unc-70::mKate2                       | pSC24 Pdpy-7::unc-70                                | PCR generated<br>pSJ9061Pmyo-3::mKate2 template            | mKate2 F 5'-ctagcagctcgtctccagctcacaaggag-3'<br>mKate2 R 5'-gtaccggtacctatagagctgacglaacggcg-3'                                                                                                                                                                                                    | Restriction digest        | NheI/KpnI     | This work       |
| pSC27                 | Pdpy-7::unc-70(DN)::mKate2                   | pSC25 Pdpy-7::unc-70(DN)                            | PCR generated<br>pSJ9061Pmyo-3::mKate2 template            | mKate2 F 5'-ctagcagctcgtctccagctcacaaggag-3'<br>mKate2 R 5'-gtaccggtacctatagagctgacglaacggcg-3'                                                                                                                                                                                                    | Restriction digest        | NheI/KpnI     | This work       |
| pSC30                 | Minimal-Mos1-NeoR-Pdpy-7::unc-70::mKate2     | PCR generated<br>pCFJ910 Minimal-Mos1-NeoR template | PCR generated<br>pSC26 Pdpy-7::unc-70::mKate2 template     | miniMos F 5'-tactatgaaactctcacaacgaagctgatacagcggtagctaccatggga-3'<br>miniMos R 5'-acctccaatatacacaacatacctctgagctgtaacctctagtaag-3'<br>Pdpy-7 Insert F 5'-tccatggtgagctaccggtctagatacaagcctgctgagatgagttcagata-3'<br>Pdpy-7 Insert R 5'-cttactagagggtagcagagctcagaagaacagttatggtatattggaaatg-3'   | Gibson assembly           | -             | This work       |
| pSC31                 | Minimal-Mos1-NeoR-Pdpy-7::unc-70(DN)::mKate2 | PCR generated<br>pCFJ910 Minimal-Mos1-NeoR template | PCR generated<br>pSC27 Pdpy-7::unc-70(DN)::mKate2 template | miniMos F 5'-tactatgaaactctcacaacgaagctgatacagcggtagctaccatggga-3'<br>miniMos R 5'-acctccaatatacacaacatacctctgagctgtaacctctagtaag-3'<br>Pdpy-7 Insert F 5'-tccatggtgagctaccggtctagatacaagcctgctgagatgagttcagata-3'<br>Pdpy-7 Insert R 5'-cttactagagggtagcagagctcagaagaacagttatggtatattggaaatg-3'   | Gibson assembly           | -             | This work       |
| pCFJ910               | Minimal-Mos1-NeoR                            | -                                                   | -                                                          | -                                                                                                                                                                                                                                                                                                  | -                         | -             | Erik Jorgensen  |
| pSC28                 | Pmec-4::unc-70::mKate2                       | Pmec-4::unc-54(3'UTR)                               | pSC26 Pdpy-7::unc-70::mKate2                               | -                                                                                                                                                                                                                                                                                                  | Restriction digest        | KpnI/XmaI     | This work       |
| pSC32                 | Minimal-Mos1-NeoR-Pmec-4::unc-70::mKate2     | PCR generated<br>pCFJ910 Minimal-Mos1-NeoR template | PCR generated<br>pSC28 Pmec-4::unc-70::mKate2 template     | miniMos F 5'-tactatgaaactctcacaacgaagctgatacagcggtagctaccatggg-3'<br>miniMos R 5'-acctccaatatacacaacatacctctgagctgtaacctctagtaag-3'<br>Pmec-4 Insert F 5'-tccatggtgagctaccggtctagatacaagcctcacaacataccta-3'<br>Pmec-4 Insert R 5'-cttactagagggtagcagagctcactagaacagttatggtatattggaaatg-3'          | Gibson assembly           | -             | This work       |
| pSC37                 | Mos1-NeoR-Pmec-4::unc-70(DN)::mKate2         | pSC32 Minimal-Mos1-NeoR-Pmec-4::unc-70::mKate2      | -                                                          | unc-70(DN) F 5'-cgaagaacatcaaacccaagaacacagcagg-3'<br>unc-70(DN) R 5'-cctcgttctctgaggtttgaggttctctg-3'                                                                                                                                                                                             | Site-directed Mutagenesis | -             | This work       |
| pMA122                | Phsp16.41::peel-1                            | -                                                   | -                                                          | -                                                                                                                                                                                                                                                                                                  | -                         | -             | Erik Jorgensen  |
| pCFJ601               | Peft-3::mos1                                 | -                                                   | -                                                          | -                                                                                                                                                                                                                                                                                                  | -                         | -             | Erik Jorgensen  |

**Supplementary Table 3.**  
Details of the construction and source of all plasmids generated and used in this work.
